# Supplementary material for: Five decades of change in somatic growth of Pacific hake from Puget Sound and Strait of Georgia
Source: PeerJ. 2022 Jul 13;10:e13577. doi: 10.7717/peerj.13577 (PMC9288167; doi:10.7717/peerj.13577)
Supplement: Supplemental Information 2 — Data provided by Washington Department of Fish and Wildlife. For more details about the Puget Sound survey see Blaine J, Lowry D, Pacunski R (2020) 2002–2007 WDFW scientific bottom trawl surveys in the southern Salish Sea: species distributions, abundance, and population trends. Washington Department of Fish and Wildlife, Olympia, WA. Pp. 252. https://wdfw.wa.gov/sites/default/files/publications/02140/wdfw02140.pdf [file peerj-10-13577-s002.xlsx]

## Sheet: wdfw_lf_summary
SurveyYear	Sizebin (cm)	FishCount	Percent
1987	0-10	54	5.3
1987	11-20	108	10.6
1987	21-30	176	17.2
1987	31-40	389	38.1
1987	41-50	213	20.9
1987	51-60	57	5.6
1987	61-70	19	1.9
1987	71-80	5	0.5
1989	0-10	6	0.7
1989	11-20	456	52.1
1989	21-30	312	35.7
1989	31-40	55	6.3
1989	41-50	25	2.9
1989	51-60	13	1.5
1989	61-70	8	0.9
1995	11-20	702	61
1995	21-30	416	36.1
1995	31-40	30	2.6
1995	41-50	2	0.2
1995	51-60	1	0.1
1996	0-10	3	0.4
1996	11-20	377	53.8
1996	21-30	269	38.4
1996	31-40	28	4
1996	41-50	17	2.4
1996	51-60	6	0.9
1996	61-70	1	0.1
1997	11-20	141	26.6
1997	21-30	130	24.5
1997	31-40	112	21.1
1997	41-50	100	18.8
1997	51-60	40	7.5
1997	61-70	8	1.5
2001	11-20	18	4.9
2001	21-30	20	5.4
2001	31-40	152	41.3
2001	41-50	110	29.9
2001	51-60	57	15.5
2001	61-70	9	2.4
2001	71-80	2	0.5
2002	0-10	8	0.6
2002	11-20	563	41.2
2002	21-30	544	39.8
2002	31-40	145	10.6
2002	41-50	74	5.4
2002	51-60	28	2
2002	61-70	4	0.3
2005	11-20	883	37.1
2005	21-30	1195	50.2
2005	31-40	93	3.9
2005	41-50	88	3.7
2005	51-60	89	3.7
2005	61-70	32	1.3
2008	0-10	4	0.4
2008	11-20	744	82.3
2008	21-30	110	12.2
2008	31-40	29	3.2
2008	41-50	8	0.9
2008	51-60	8	0.9
2008	61-70	1	0.1
2009	11-20	1135	78.3
2009	21-30	268	18.5
2009	31-40	29	2
2009	41-50	7	0.5
2009	51-60	6	0.4
2009	61-70	4	0.3
2010	11-20	808	76.4
2010	21-30	220	20.8
2010	31-40	20	1.9
2010	41-50	3	0.3
2010	51-60	5	0.5
2010	61-70	2	0.2
2011	11-20	955	87.7
2011	21-30	89	8.2
2011	31-40	24	2.2
2011	41-50	11	1
2011	51-60	6	0.6
2011	61-70	4	0.4
2012	0-10	5	0.4
2012	11-20	772	55.9
2012	21-30	583	42.2
2012	31-40	11	0.8
2012	41-50	6	0.4
2012	51-60	2	0.1
2012	61-70	3	0.2
2013	11-20	820	77.8
2013	21-30	226	21.4
2013	31-40	4	0.4
2013	51-60	4	0.4
2014	11-20	426	88.2
2014	21-30	46	9.5
2014	31-40	2	0.4
2014	41-50	1	0.2
2014	51-60	7	1.4
2014	61-70	1	0.2
2015	0-10	1	0.2
2015	11-20	369	86.6
2015	21-30	54	12.7
2015	41-50	1	0.2
2015	51-60	1	0.2
2016	0-10	4	0.3
2016	11-20	997	85.4
2016	21-30	154	13.2
2016	31-40	7	0.6
2016	41-50	2	0.2
2016	51-60	4	0.3
2017	11-20	521	65
2017	21-30	263	32.8
2017	31-40	3	0.4
2017	41-50	8	1
2017	51-60	7	0.9
2018	11-20	397	72.2
2018	21-30	143	26
2018	31-40	8	1.5
2018	51-60	2	0.4
2019	0-10	8	1.4
2019	11-20	351	61.6
2019	21-30	204	35.8
2019	31-40	5	0.9
2019	41-50	1	0.2
2019	51-60	1	0.2
2021	0-10	1	0.1
2021	11-20	525	73.2
2021	21-30	180	25.1
2021	31-40	7	1
2021	41-50	3	0.4
2021	51-60	1	0.1
